# Supplementary material
Source: Royal Society of Chemistry journal article supplement (doi:10.1039/d6qm00086j)
Supplement: d6qm00086j1.pdf [file d6qm00086j1.pdf]

## Supporting Information

### Programmable Folding Kinetics in Single-Composition Hydrogel Actuators via UV-Induced Microphase Separation

Gi-Yeon Han,<sup>†a</sup> Yumi Rho,<sup>†b</sup> Jiayu Zhao,<sup>b</sup> Willie Lei,<sup>b</sup> Jinhye Bae<sup>\*a,b</sup>

Gi-Yeon Han, Jinhye Bae

<sup>a</sup> Department of Chemical Engineering, Chung-Ang University, Seoul, 06974, Republic of Korea

Yumi Rho, Jiayu Zhao, Willie Lei, Jinhye Bae

<sup>b</sup> Department of Chemical and Nano Engineering, University of California San Diego, La Jolla, CA 92093, USA

<sup>†</sup> These authors contributed equally to this work

Corresponding author E-mail: j3bae@ucsd.edu, jbae@cau.ac.kr

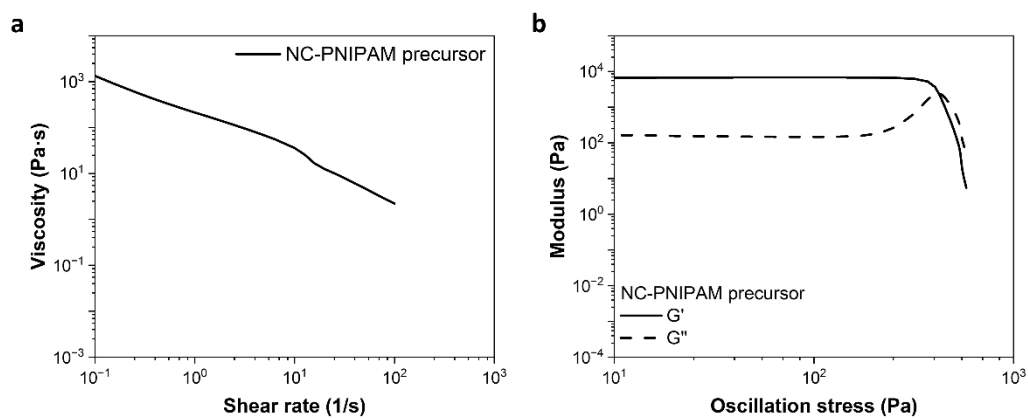

**Fig. S1.** Rheological properties of the NC-PNIPAM precursor. a) Measured viscosity under shear rate sweep mode at steady state. b) Measured modulus under strain sweep mode at oscillatory state.

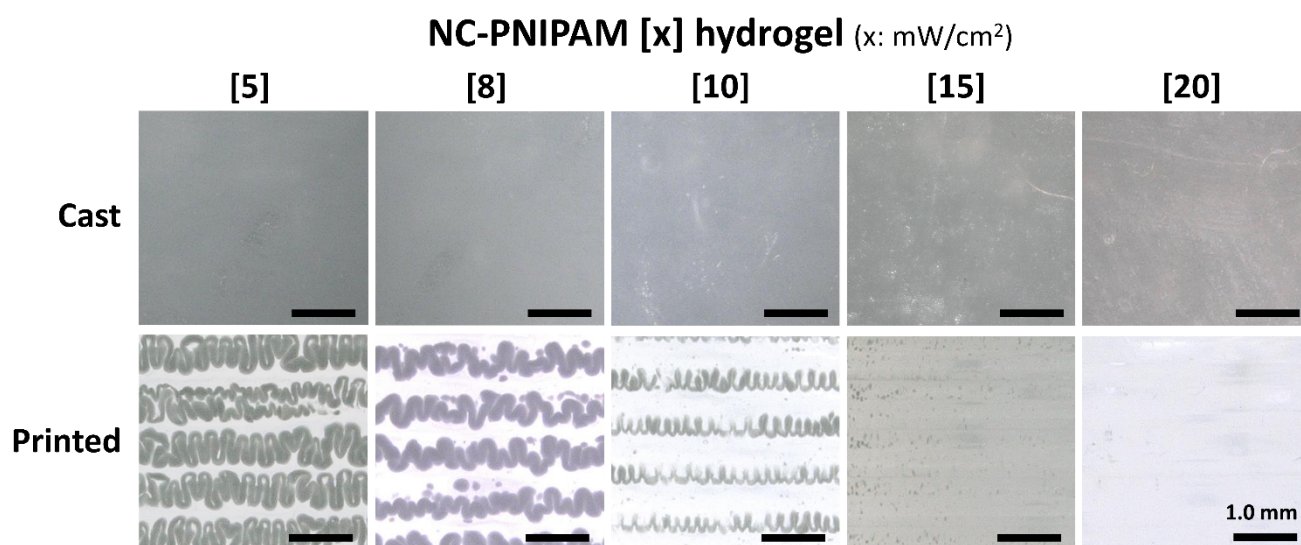

**Fig. S2.** Optical micrographs of the cast and extrusion-printed NC-PNIPAM [x] (x: 5, 8, 10, 15, and 20) hydrogels.

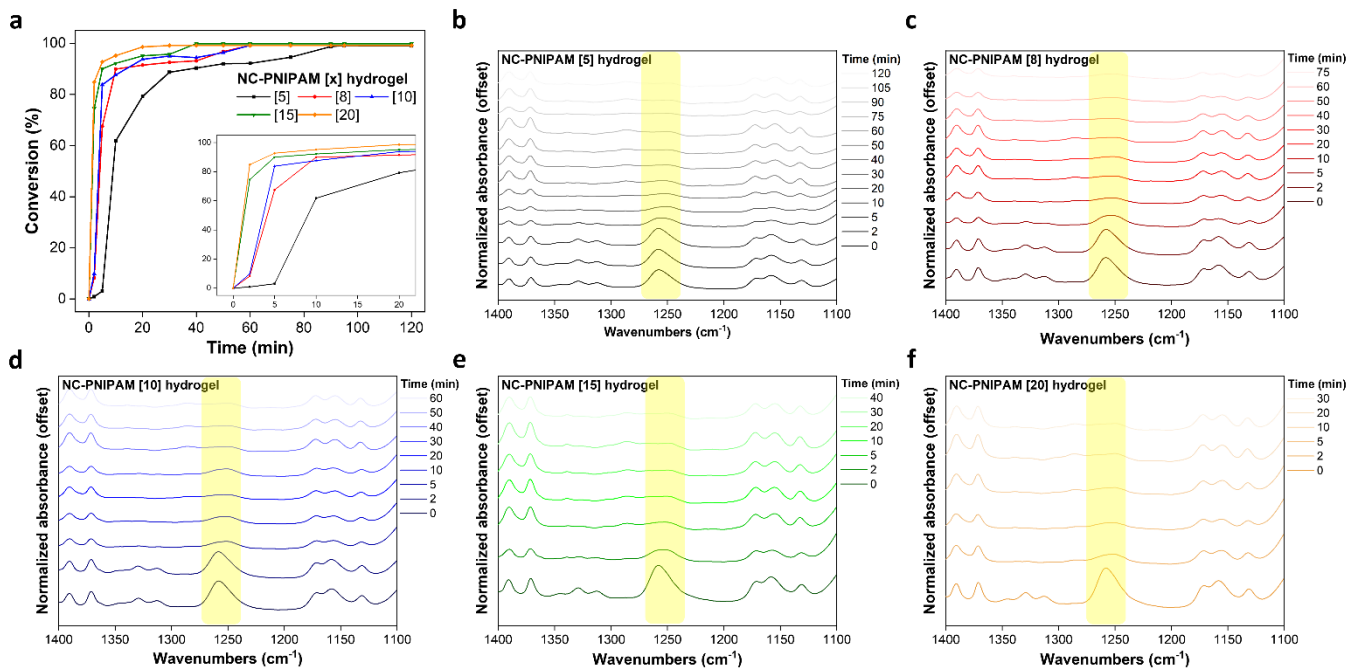

**Fig. S3.** a) Conversion of the NC-PNIPAM precursor under 365 nm UV light irradiation at different time points. Conversion of the NC-PNIPAM precursor was calculated by reduction rate of 1,270  $\text{cm}^{-1}$  band (acrylate C=C) at the FT-IR spectra. b, c, d, e, and f) Change of the FT-IR spectra of the NC-PNIPAM precursor with different UV intensities and irradiation time.

### NC-PNIPAM [x] hydrogel (x: $\text{mW}/\text{cm}^2$ )

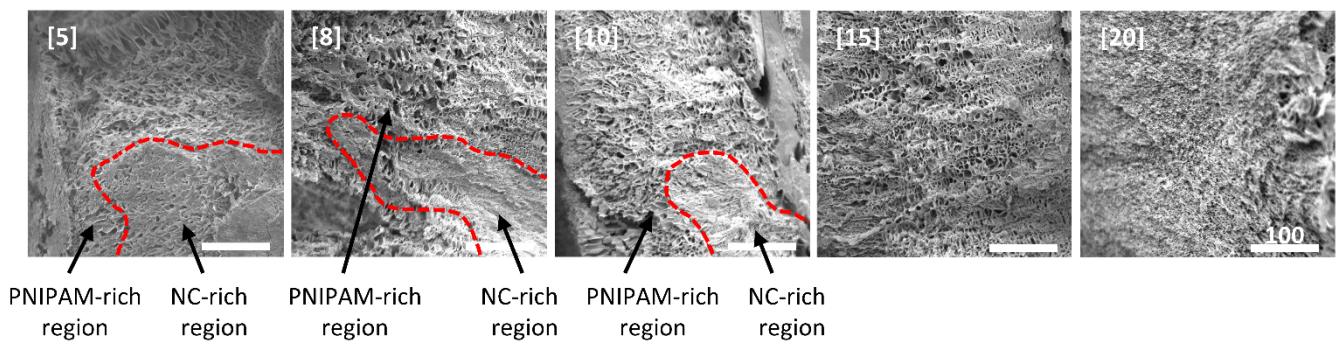

**Fig. S4.** SEM images of the freeze-dried NC-PNIPAM [x] (x: 5, 8, 10, 15, and 20) hydrogels (magnification: 500X). The red dashed lines in the NC-PNIPAM [x] (x: 5, 8, and 10) hydrogels represent the boundaries between the PNIPAM-rich and NC-rich regions. NC-PNIPAM [x] (x: 15 and 20) hydrogels exhibit no observable NC-rich region.

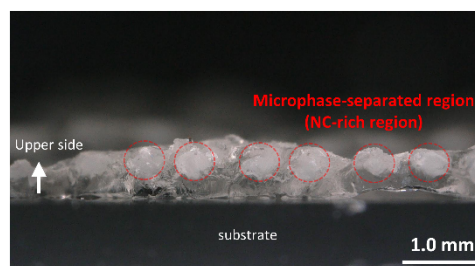

**Fig. S5.** Side view image of NC-PNIPAM [8] hydrogel. Red dotted circles represent the microphase-separated (NC-rich) regions.

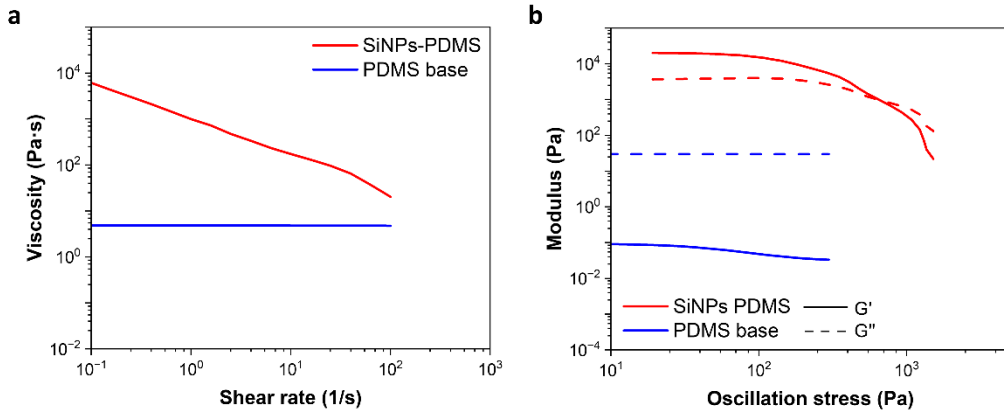

**Fig. S6.** Rheological properties of the pure PDMS base and SiNPs-PDMS resin. a) Measured viscosity under shear rate sweep mode at steady state. b) Measured modulus under strain sweep mode at oscillatory state.

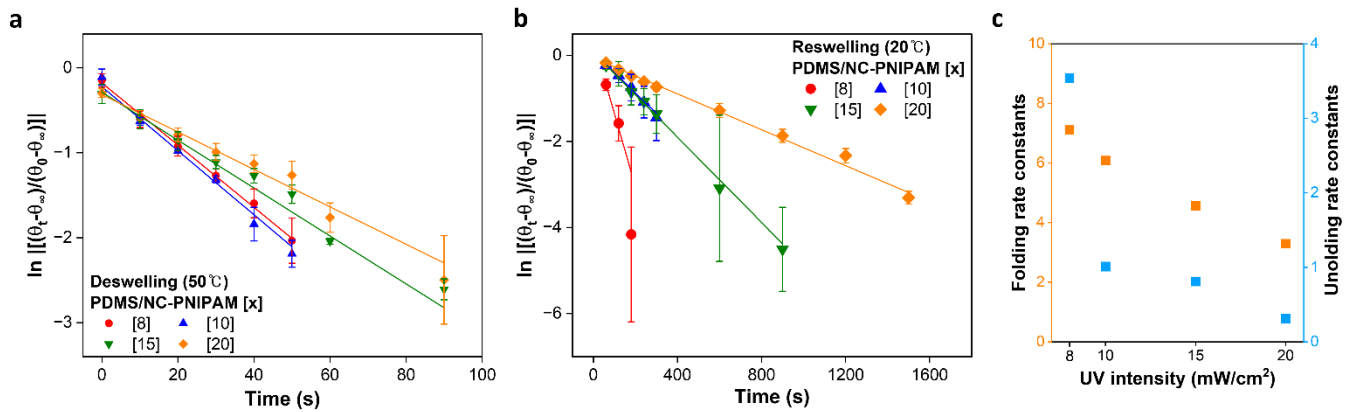

**Fig. S7.** The relative change of a) folding and b) unfolding angle ( $\ln \left[ \frac{\theta_t - \theta_\infty}{\theta_0 - \theta_\infty} \right]$ ) of PDMS/NC-PNIPAM [x] (x: 8, 10, 15, and 20) and fitted curve as a function of time, where  $\theta_0$ ,  $\theta_t$ , and  $\theta_\infty$  are folding-unfolding angle of hinge at initial, time t, and equilibrium states, respectively. c) Calculated folding-unfolding rate constants of PDMS/NC-PNIPAM [x] (x: 8, 10, 15, and 20). The folding-unfolding rate constants was calculated by dividing the equilibrium folding-unfolding angle by the folding-unfolding equilibrium time (inverse of the slope of the fitted curve).

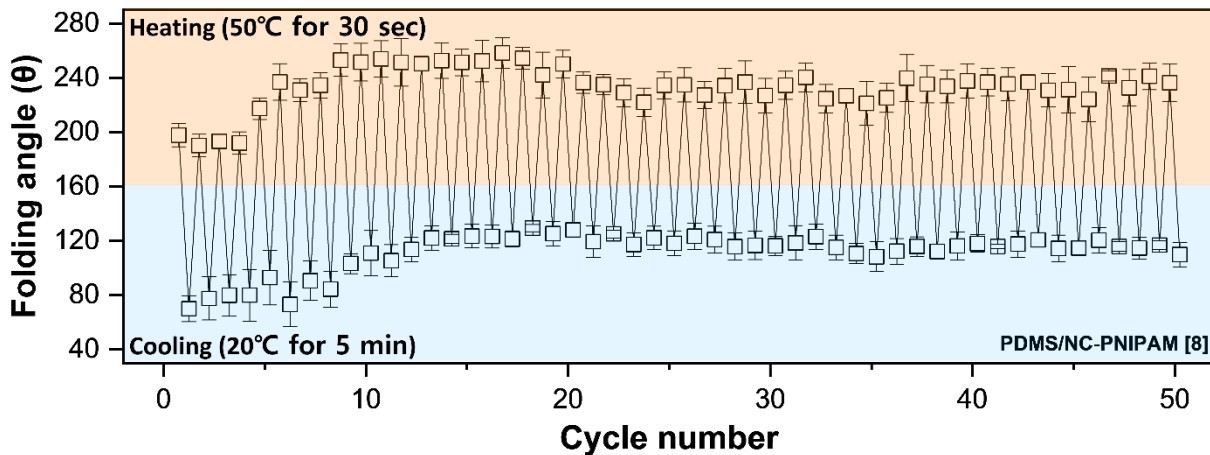

**Fig. S8.** Reversible folding angle change of the PDMS/NC-PNIPAM [8] under 50 consecutive cycles of deswelling (50°C DIW for 30 seconds) and reswelling (20°C DIW for 5 minutes). The cyclic test was conducted without rest.

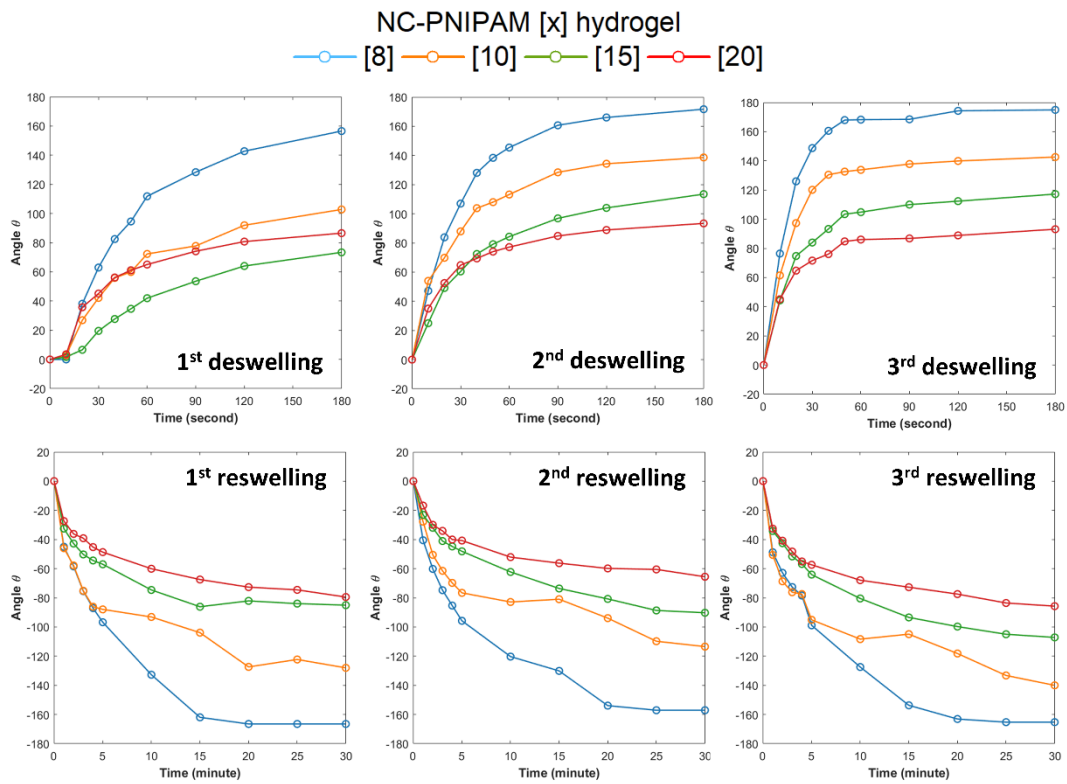

**Fig. S9.** Angular change in the hinge units, which consisting of NC-PNIPAM [x] ( $x = 8, 10, 15$  and  $20$ ) hydrogels, of the 4-hinge strip when immersed in  $50^{\circ}\text{C}$  (deswelling) and  $20^{\circ}\text{C}$  (reswelling) DIW, respectively.

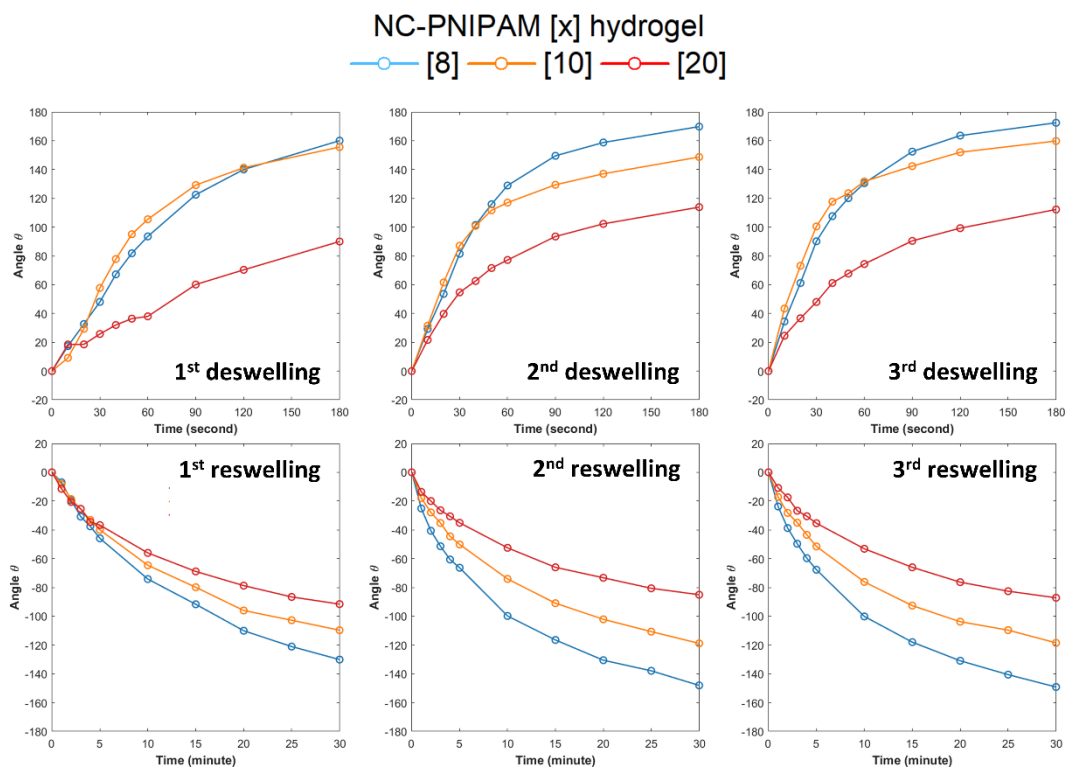

**Fig. S10.** Angular change in the hinge units, which consist of NC-PNIPAM [x] ( $x = 8, 10,$  and  $20$ ) hydrogels, of the 3-hinge gripper when immersed in  $50^{\circ}\text{C}$  (deswelling) and  $20^{\circ}\text{C}$  (reswelling) DIW, respectively.

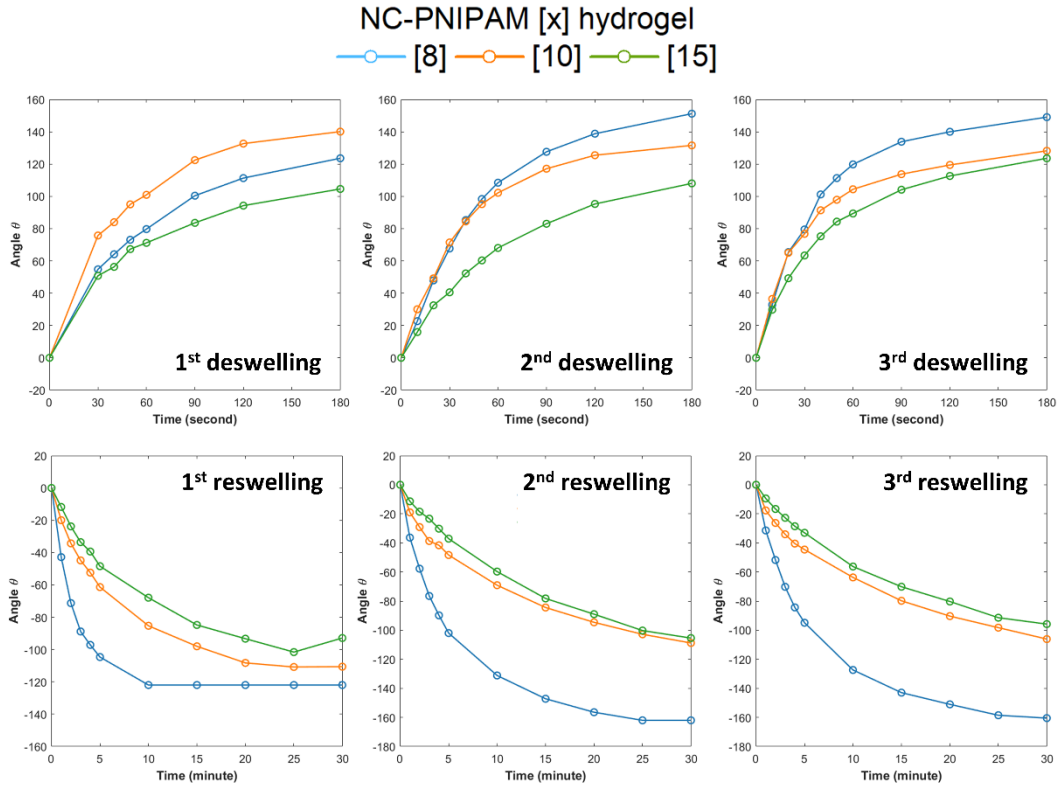

**Fig. S11.** Angular change in the hinge units, which consist of NC-PNIPAM [x] ( $x = 8, 10,$  and  $15$ ) hydrogels, of the 3-hinge gripper when immersed in  $50^{\circ}\text{C}$  (deswelling) and  $20^{\circ}\text{C}$  (reswelling) DIW, respectively.

**Table S1.** Values derived from the folding-unfolding kinetics equation. The equation is  $\ln \left| \frac{\theta_t - \theta_{\infty}}{\theta_0 - \theta_{\infty}} \right| = -\frac{t}{\tau} + \ln A$ , where  $\theta_0$ ,  $\theta_t$ , and  $\theta_{\infty}$  are folding angle of hinge at initial, time  $t$ , and equilibrium states, respectively.  $\tau$  stands for the equilibrium time, and  $A$  is an intercept.

| PDMS/NC PNIPAM [x]     | x  | Equilibrium time ( $\tau$ ) (sec) | Intercept ( $\ln A$ ) | $R^2$ | Equilibrium folding-unfolding angle ( $\text{eq}^{\circ}$ ) | Folding-unfolding rate constants ( $\text{eq}^{\circ}/\tau$ ) |
|------------------------|----|-----------------------------------|-----------------------|-------|-------------------------------------------------------------|---------------------------------------------------------------|
| Deswelling (folding)   | 8  | 27.3                              | -0.17752              | 0.995 | 194.03                                                      | 7.11                                                          |
|                        | 10 | 26.5                              | -0.22139              | 0.981 | 161.22                                                      | 6.08                                                          |
|                        | 15 | 35.4                              | -0.28717              | 0.975 | 161.69                                                      | 4.56                                                          |
|                        | 20 | 45.4                              | -0.31388              | 0.984 | 149.26                                                      | 3.29                                                          |
| Reswelling (unfolding) | 8  | 58.7                              | 0.34768               | 0.916 | 207.88                                                      | 3.54                                                          |
|                        | 10 | 211.4                             | 0.07183               | 0.992 | 188.35                                                      | 1.01                                                          |
|                        | 15 | 202.0                             | 0.07575               | 0.994 | 164.56                                                      | 0.81                                                          |
|                        | 20 | 480.8                             | -0.05911              | 0.994 | 146.65                                                      | 0.31                                                          |

**Table S2.** Folding kinetics table of the previously reported PNIPAM-based and hinge-structured thermo-responsive soft actuators.\*

| Active materials  | Active layer dimension (LxWxT mm <sup>3</sup> ) | Passive layer | Kinetics control factor       | Folding angle (°) | Folding duration (sec) | Folding kinetics (°/sec) | Ref.     |
|-------------------|-------------------------------------------------|---------------|-------------------------------|-------------------|------------------------|--------------------------|----------|
| PNIPAM-NC         | 2.4 x 7.0 x 0.6                                 | PDMS          | Phase separation structure    | 140-200           | 90-180                 | 0.79-2.22                | Our work |
| P(NIPAM-co-NaMAc) | 2.0 x 2.0 x 1.0                                 | NIPAM         | Fe <sup>3+</sup> crosslinking | 75                | 120                    | 0.63                     | [1]      |
| P(NIPAM-co-SA)    | 12.0 x 3 x 0.5                                  | PP            | SA concentration              | 160               | 150                    | 1.07                     | [2]      |
| PNIPAM-SWCNT      | 3.0 x 5.0 x 0.4                                 | LDPE          | SWNT concentration            | 90                | 600                    | 0.15                     | [3]      |
| PNIPAM-GO         | 25.0 x 5.0 x 1.0                                | PNIPAM        | Hinge geometry                | 160               | 3,600                  | 0.04                     | [4]      |
| P(NIPAM-co-MOEP)  | 20.0 x 5.0 x 0.6                                | PNIPAM        | LiCl crosslinking             | 100               | 300                    | 0.33                     | [5]      |
| PNIPAM-MMT        | 50.0 x 10.0 x 1.0                               | PNIPAM        | Gradation                     | 90                | 30                     | 3.0                      | [6]      |

\* NIPAM: N-Isopropylacrylamide, NC: nanoclay(laponite), PDMS: polydimethylsiloxane, NaMAc: sodium methacrylate, SA: stearyl acrylate, PP: polypropylene, LDPE: low-density polyethylene, SWCNT: single-walled carbon nanotube, GO: graphene oxide, MOEP: 2-(methacryloyloxy)ethyl phosphate, and MMT: montmorillonite.

## References

- [1] Z. Xu and J. Fu, Programmable and Reversible 3D-/4D-Shape-Morphing Hydrogels with Precisely Defined Ion Coordination, *ACS Applied Materials & Interfaces*, 2020, **12**, 26476-26484.
- [2] K. Liu, Y. Zhang, H. Cao, H. Liu, Y. Geng, W. Yuan, J. Zhou, Z. L. Wu, G. Shan, Y. Bao, Q. Zhao, T. Xie and P. Pan, Programmable Reversible Shape Transformation of Hydrogels Based on Transient Structural Anisotropy, *Advanced Materials*, 2020, **32**.
- [3] X. Zhang, C. L. Pint, M. H. Lee, B. E. Schubert, A. Jamshidi, K. Takei, H. Ko, A. Gillies, R. Bardhan, J. J. Urban, M. Wu, R. Fearing and A. Javey, Optically- and Thermally-Responsive Programmable Materials Based on Carbon Nanotube-Hydrogel Polymer Composites, *Nano Letters*, 2011, **11**, 3239-3244.
- [4] M. Li and J. Bae, Programmable Dual-Responsive Actuation of Single-Hydrogel-Based Bilayer Actuators by Photothermal and Skin Layer Effects with Graphene Oxides, *Advanced Materials Interfaces*, 2023, **10**.
- [5] A. B. Baker, D. F. Wass and R. S. Trask, Thermally induced reversible and reprogrammable actuation of tough hydrogels utilising ionoprinting and iron coordination chemistry, *Sensors and Actuators B: Chemical*, 2018, **254**, 519-525.
- [6] J. Liu, W. Xu, Z. Kuang, P. Dong, Y. Yao, H. Wu, A. Liu and F. Ye, Gradient porous PNIPAM-based hydrogel actuators with rapid response and flexibly controllable deformation, *Journal of Materials Chemistry C*, 2020, **8**, 12092-12099.
